# Supplementary material for: Bmlark is essential for embryonic development
Source: PubMed Central journal article supplement — BMC Genomics. 2024 Dec 4;25:1179. doi: 10.1186/s12864-024-11107-2 (PMC11619667; doi:10.1186/s12864-024-11107-2), 2024-12-04
Supplement: 12864_2024_11107_MOESM1_ESM.pdf [file 12864_2024_11107_MOESM1_ESM.pdf]

**Supplementary Table S1. Sequences of sgRNAs and all the primers used in this study**

| <b>sgRNA or Primer</b>                    | <b>Sequence</b>                                                                                                                  |
|-------------------------------------------|----------------------------------------------------------------------------------------------------------------------------------|
| <b>sgRNA</b>                              |                                                                                                                                  |
| sgRNA<br>(Target site1)                   | TAATACGACTCACTATAGGTAATCTAAAATGCCGGGC<br>ACGTTTTAGAGCTAGAAATAGCAAGTTAAAATAAGG<br>CTAGTCCGTTATCAACTTGAAAAAGTGGCACCGAGT<br>CGGTGCT |
| sgRNA<br>(Target site2)                   | TAATACGACTCACTATAGGCGGTCTAAGATCGGCTTC<br>TGGTTTTAGAGCTAGAAATAGCAAGTTAAAATAAGG<br>CTAGTCCGTTATCAACTTGAAAAAGTGGCACCGAGT<br>CGGTGCT |
| <b>Primers for the synthesis of sgRNA</b> |                                                                                                                                  |
| sgRNA-F<br>(for target site1)             | TAATACGACTCACTATAGGTAATCTAAAATGCCGGGC<br>ACGTTTTAGAGCTAGAAATAGCAAGTTAAAATAAGG<br>CTAG                                            |
| sgRNA-F<br>(for target site2)             | TAATACGACTCACTATAGGCGGTCTAAGATCGGCTTC<br>TGGTTTTAGAGCTAGAAATAGCAAGTTAAAATAAGG<br>CTAG                                            |
| sgRNA-R                                   | AGCACCGACTCGGTGCCACTTTTTCAAGTTGATAAC<br>GGACTAGCCTTATTTAACTTGCTATTTCTAGCTCTA<br>AA                                               |
| 18T-F                                     | CGGTGATGACGGTGAAAACCTC                                                                                                           |
| 18T-R                                     | AAAAAAGCACCGACTCGGTGCC                                                                                                           |
| <b>Primers for screening mutants</b>      |                                                                                                                                  |
| <i>Bmlark</i> test-F                      | CGCCATTTTGTAGCGGAGTT                                                                                                             |
| <i>Bmlark</i> test-R                      | GACCATCATACCGTTCAACTCTT                                                                                                          |
| <b>Primers for RT-qPCR analysis</b>       |                                                                                                                                  |
| ChsA-qF                                   | GGAGTTATCGCAAAGGGGACA                                                                                                            |
| ChsA-qR                                   | CAAACCTGCTTATCTCGACCTAAGT                                                                                                        |
| ChsB-qF                                   | AGTGCTACTCAGCGATGCCAAT                                                                                                           |
| ChsB-qR                                   | GCCACCCAGAGAGATGTAGAC                                                                                                            |
| Cht5-qF                                   | AACTCAATGGGTGGGCTACG                                                                                                             |
| Cht5-qR                                   | CGCATAGTCCCTTAAAATCGTC                                                                                                           |
| Cht10-qF                                  | GACAGGTCACCTAGCTCCCATG                                                                                                           |
| Cht10-qR                                  | CTCTTTATCGGCTCCTTTGTCTA                                                                                                          |
| CPR58-qF                                  | GACTACGCCGCGGATGAC                                                                                                               |
| CPR58-qR                                  | GATAAAGGTGGATAGGCAGGAAC                                                                                                          |
| CPR92-qF<br>(WCP5-qF)                     | CCGTGATGGTGATGTCGTGA                                                                                                             |
| CPR92-qR                                  | GCTGAATCCGTTGTGGTGG                                                                                                              |

|                  |                          |
|------------------|--------------------------|
| (WCP5-qR)        |                          |
| CPG16-qF         | TAGCGATGTTGATGGAAGCG     |
| CPG16-qR         | TGCCGAAGCCGCTATGAC       |
| CPG49-qF         | AGGCTTACCTCATCTTGGACTCG  |
| CPG49-qR         | GCGTCGCCGTGCTTATGTC      |
| CPH3-qF          | TCGCAATCAATGAACAAAACG    |
| CPH3-qR          | GGGCTTGCCATTTCTTATCCT    |
| LCP16/17-qF      | ATGACGGGAACTGTGCTAAAAA   |
| LCP16/17-qR      | GCTAAACTTTCATCCTTGATTGGC |
| CPR14-qF         | GGGGGTAAGAGCCAAAGGAT     |
| CPR14-qR         | TTTGGAAGAGGATGAATGTGA    |
| CPR62-qF         | TTCTCGTATTCGCCTTGCT      |
| CPR62-qR         | AGCGAGTATTTGCCGACCA      |
| CPR101-qF        | CTGATGACCACCACGGCTTC     |
| CPR101-qR        | GATGAGCCAAGAGGACAGGTG    |
| CPR132-qF        | CCAGGTGCCAGGAAGTGACA     |
| CPR132-qR        | AGCATCGTTGGGGAAGAGAA     |
| CPG14-qF         | CGCTCCTTCGTCCATCGTCA     |
| CPG14-qR         | TGTAGCCCTCGGTTTCCTGG     |
| CPT2-qF          | CCTGAACCTCCAGTGGGATACA   |
| CPT2-qR          | GGAAATGCTGCCTCCAGAAAG    |
| CPT3-qF          | CCCATCATCCCCGCTCAA       |
| CPT3-qR          | TGGGTGGGAGCAGCAGTG       |
| BGIBMGA010281-qF | CCGACATTCCGCAAACCT       |
| BGIBMGA010281-qR | TGGAACACTTGACAACGGGT     |
| BGIBMGA011851-qF | ATGCCGTTTGGCGTTTTGTTA    |
| BGIBMGA011851-qR | TTTCCACAGTATCAGTGCCTTCT  |
| POUM2-qF         | GAGCCTGCCGACATGAAGTA     |
| POUM2-qR         | GAGGCTTCACGTCTGGTTGA     |
| WCP1-qF          | CTGTCGCTAAGGTGATCGCTC    |
| WCP1-qR          | GACTCGTGCTGGGACTTGTTG    |
| WCP2-qF          | GCTCGCTGTTGCTACCCCT      |
| WCP2-qR          | CCGAGGAGTAGCGGAGTGGA     |
| WCP3-qF          | TGCCGAGTCCGTCTCTTCC      |
| WCP3-qR          | GTAGGTGACGGGTGTAGCGA     |
| WCP6-qF          | TACGACGCTCATCCTCAGTACA   |
| WCP6-qR          | CGGGGTCAACGACGGAGTA      |
| WCP9-qF          | GCTGAAGAGCAGGGCTACATAA   |
| WCP9-qR          | GGAACCCATTTTCATCCGCCAG   |
| WCP10-qF         | CTGATGGCAAAGTTTACACCGT   |

|               |                          |
|---------------|--------------------------|
| WCP10-qR      | ACGGGAGGAGGAGTGGGTAA     |
| WCP11-qF      | ACACGAACACTGACGGCAAA     |
| WCP11-qR      | GGAGGCGACCTGAGGAATAGA    |
| Th-qF         | TCGCTTTCGCTTACAAATACGG   |
| Th-qR         | TGGGCATCAAATCAAGCACG     |
| aaNAT-qF      | CTACCTTGAGCGATGGAGTTTC   |
| aaNAT-qR      | TTTTGGATTGGGGCAGTCTT     |
| DDC-qF        | GACTGCTGTGATGGCGGATA     |
| DDC-qR        | CGGGATACGAGTTAGCGGTT     |
| Yellow-f2-qF  | GTAGCATTCAAAGAAGGCAGTGTT |
| Yellow-f2-qR  | TATCCAAGTCCAGTGTAACCGC   |
| Laccase 2A-qF | TGGACTCGTTCAAACACACCC    |
| Laccase 2A-qR | TTCCTAACGCCTCCACTCAGC    |

---

F: Forward primer; R: Reversed primer.

qF: Forward primer for RT-qPCR; qR: Reversed primer for RT-qPCR.
