# Supplementary material for: Bmlark is essential for embryonic development
Source: PubMed Central journal article supplement — BMC Genomics. 2024 Dec 4;25:1179. doi: 10.1186/s12864-024-11107-2 (PMC11619667; doi:10.1186/s12864-024-11107-2), 2024-12-04
Supplement: 12864_2024_11107_MOESM2_ESM.pdf [file 12864_2024_11107_MOESM2_ESM.pdf]

**Supplementary Table S2. Statistics on microinjection and mutation screening**

| <b>Target site</b> | <b>Number of injected embryos</b> | <b>Number of hatched individuals</b> | <b>Hatching rate</b> | <b>Number of adults detected</b> | <b>Number of mutant individuals in detected adults</b> | <b>Mutation rate</b> |
|--------------------|-----------------------------------|--------------------------------------|----------------------|----------------------------------|--------------------------------------------------------|----------------------|
| site1              | 466                               | 63                                   | 13.52%               | 30                               | 1                                                      | 3.33%                |
|                    | 157                               | 35                                   | 22.29%               | 21                               | 2                                                      | 9.52%                |
|                    | 96                                | 35                                   | 36.46%               | 10                               | 7                                                      | 70.00%               |
| site2              | 245                               | 30                                   | 12.24%               | 2                                | 2                                                      | 100.00%              |
|                    | 144                               | 56                                   | 38.80%               | 19                               | 1                                                      | 5.26%                |
|                    | 250                               | 100                                  | 40.00%               | 11                               | 3                                                      | 27.27%               |
