# Supplementary material for: Bmlark is essential for embryonic development
Source: PubMed Central journal article supplement — BMC Genomics. 2024 Dec 4;25:1179. doi: 10.1186/s12864-024-11107-2 (PMC11619667; doi:10.1186/s12864-024-11107-2), 2024-12-04
Supplement: 12864_2024_11107_MOESM6_ESM.pdf [file 12864_2024_11107_MOESM6_ESM.pdf]

**Supplementary Table S7. Significantly enriched GO terms (padj<0.05)**

| <b>Category</b> | <b>GO ID</b> | <b>Description</b>                                | <b>Gene Count</b> | <b>Down</b> | <b>UP</b> | <b>padj</b> |
|-----------------|--------------|---------------------------------------------------|-------------------|-------------|-----------|-------------|
| BP              | GO:0006022   | aminoglycan metabolic process                     | 12                | 7           | 5         | 0.008546    |
| BP              | GO:0006030   | chitin metabolic process                          | 10                | 6           | 4         | 0.008546    |
| BP              | GO:0006040   | amino sugar metabolic process                     | 10                | 6           | 4         | 0.008546    |
| BP              | GO:1901071   | glucosamine-containing compound metabolic process | 10                | 6           | 4         | 0.008546    |
| CC              | GO:0005576   | extracellular region                              | 25                | 17          | 8         | 6.41E-06    |
| MF              | GO:0042302   | structural constituent of cuticle                 | 34                | 16          | 18        | 1.10E-13    |
| MF              | GO:0005198   | structural molecule activity                      | 36                | 18          | 18        | 8.82E-07    |
| MF              | GO:0008061   | chitin binding                                    | 10                | 6           | 4         | 0.002926    |
| MF              | GO:0050660   | flavin adenine dinucleotide binding               | 11                | 6           | 5         | 0.021061    |

BP:Biological Process. CC:Cell Component. MF:Molecular Function. Down: Down-regulated gene count. UP: Up-regulated gene count.
